# Supplementary material for: The Risk Factors and Screening Uptake for Prostate Cancer: A Scoping Review
Source: MDPI journal article supplement (doi:10.3390/healthcare11202780), 2023-10-20
Supplement: s1 [file s1]

## Supplementary File S1

### Preferred Reporting Items for Systematic reviews and Meta-Analyses extension for Scoping Reviews (PRISMA-ScR) Checklist

| SECTION                   | ITEM | PRISMA-ScR CHECKLIST ITEM                                                                                                                                                                                                                                                 | REPORTED ON PAGE # |
|---------------------------|------|---------------------------------------------------------------------------------------------------------------------------------------------------------------------------------------------------------------------------------------------------------------------------|--------------------|
| <b>TITLE</b>              |      |                                                                                                                                                                                                                                                                           |                    |
| Title                     | 1    | Identify the report as a scoping review.                                                                                                                                                                                                                                  | 1                  |
| <b>ABSTRACT</b>           |      |                                                                                                                                                                                                                                                                           |                    |
| Structured summary        | 2    | Provide a structured summary that includes (as applicable): background, objectives, eligibility criteria, sources of evidence, charting methods, results, and conclusions that relate to the review questions and objectives.                                             | 2                  |
| <b>INTRODUCTION</b>       |      |                                                                                                                                                                                                                                                                           |                    |
| Rationale                 | 3    | Describe the rationale for the review in the context of what is already known. Explain why the review questions/objectives lend themselves to a scoping review approach.                                                                                                  | 3                  |
| Objectives                | 4    | Provide an explicit statement of the questions and objectives being addressed with reference to their key elements (e.g., population or participants, concepts, and context) or other relevant key elements used to conceptualize the review questions and/or objectives. | 4                  |
| <b>METHODS</b>            |      |                                                                                                                                                                                                                                                                           |                    |
| Protocol and registration | 5    | Indicate whether a review protocol exists; state if and where it can be accessed (e.g., a Web address); and if available, provide registration information, including the registration number.                                                                            | 4                  |
| Eligibility criteria      | 6    | Specify characteristics of the sources of evidence used as eligibility criteria (e.g., years considered, language, and publication status), and provide a rationale.                                                                                                      | 6                  |
| Information sources*      | 7    | Describe all information sources in the search (e.g., databases with dates of coverage and contact with authors to identify additional sources), as well as the date the most recent search was executed.                                                                 | 7                  |
| Search                    | 8    | Present the full electronic search strategy for at least 1 database, including any limits used, such that it could be repeated.                                                                                                                                           | 7                  |

| SECTION                                               | ITEM | PRISMA-ScR CHECKLIST ITEM                                                                                                                                                                                                                                                                                  | REPORTED ON PAGE # |
|-------------------------------------------------------|------|------------------------------------------------------------------------------------------------------------------------------------------------------------------------------------------------------------------------------------------------------------------------------------------------------------|--------------------|
| Selection of sources of evidence†                     | 9    | State the process for selecting sources of evidence (i.e., screening and eligibility) included in the scoping review.                                                                                                                                                                                      | 7                  |
| Data charting process‡                                | 10   | Describe the methods of charting data from the included sources of evidence (e.g., calibrated forms or forms that have been tested by the team before their use, and whether data charting was done independently or in duplicate) and any processes for obtaining and confirming data from investigators. | 6                  |
| Data items                                            | 11   | List and define all variables for which data were sought and any assumptions and simplifications made.                                                                                                                                                                                                     | 7                  |
| Critical appraisal of individual sources of evidence§ | 12   | If done, provide a rationale for conducting a critical appraisal of included sources of evidence; describe the methods used and how this information was used in any data synthesis (if appropriate).                                                                                                      | N/A                |
| Synthesis of results                                  | 13   | Describe the methods of handling and summarizing the data that were charted.                                                                                                                                                                                                                               | 7                  |
| <b>RESULTS</b>                                        |      |                                                                                                                                                                                                                                                                                                            |                    |
| Selection of sources of evidence                      | 14   | Give numbers of sources of evidence screened, assessed for eligibility, and included in the review, with reasons for exclusions at each stage, ideally using a flow diagram.                                                                                                                               | 7                  |
| Characteristics of sources of evidence                | 15   | For each source of evidence, present characteristics for which data were charted and provide the citations.                                                                                                                                                                                                | 8                  |
| Critical appraisal within sources of evidence         | 16   | If done, present data on critical appraisal of included sources of evidence (see item 12).                                                                                                                                                                                                                 | N/A                |
| Results of individual sources of evidence             | 17   | For each included source of evidence, present the relevant data that were charted that relate to the review questions and objectives.                                                                                                                                                                      | 10                 |
| Synthesis of results                                  | 18   | Summarize and/or present the charting results as they relate to the review questions and objectives.                                                                                                                                                                                                       | 10                 |
| <b>DISCUSSION</b>                                     |      |                                                                                                                                                                                                                                                                                                            |                    |
| Summary of evidence                                   | 19   | Summarize the main results (including an overview of concepts, themes, and types of evidence available), link to the review questions and objectives, and consider the relevance to key groups.                                                                                                            | 12                 |

| SECTION        | ITEM | PRISMA-ScR CHECKLIST ITEM                                                                                                                                                       | REPORTED ON PAGE # |
|----------------|------|---------------------------------------------------------------------------------------------------------------------------------------------------------------------------------|--------------------|
| Limitations    | 20   | Discuss the limitations of the scoping review process.                                                                                                                          | 16                 |
| Conclusions    | 21   | Provide a general interpretation of the results with respect to the review questions and objectives, as well as potential implications and/or next steps.                       | 16                 |
| <b>FUNDING</b> |      |                                                                                                                                                                                 |                    |
| Funding        | 22   | Describe sources of funding for the included sources of evidence, as well as sources of funding for the scoping review. Describe the role of the funders of the scoping review. | 17                 |

JBİ = Joanna Briggs Institute; PRISMA-ScR = Preferred Reporting Items for Systematic reviews and Meta-Analyses extension for Scoping Reviews.

\* Where *sources of evidence* (see second footnote) are compiled from, such as bibliographic databases, social media platforms, and Web sites.

† A more inclusive/heterogeneous term used to account for the different types of evidence or data sources (e.g., quantitative and/or qualitative research, expert opinion, and policy documents) that may be eligible in a scoping review as opposed to only studies. This is not to be confused with *information sources* (see first footnote).

‡ The frameworks by Arksey and O'Malley (6) and Levac and colleagues (7) and the JBİ guidance (4, 5) refer to the process of data extraction in a scoping review as data charting.

§ The process of systematically examining research evidence to assess its validity, results, and relevance before using it to inform a decision. This term is used for items 12 and 19 instead of "risk of bias" (which is more applicable to systematic reviews of interventions) to include and acknowledge the various sources of evidence that may be used in a scoping review (e.g., quantitative and/or qualitative research, expert opinion, and policy document).

*From:* [30] Tricco AC, Lillie E, Zarin W, O'Brien KK, Colquhoun H, Levac D, et al. PRISMA Extension for Scoping Reviews (PRISMA-ScR): Checklist and Explanation. *Ann Intern Med.* 2018;169:467–473. [doi: 10.7326/M18-0850](https://doi.org/10.7326/M18-0850).

## Supplementary File S2

### PRISMA-S Checklist

| Section/topic                          | #  | Checklist item                                                                                                                                                                                                                                                     | Location(s) Reported |
|----------------------------------------|----|--------------------------------------------------------------------------------------------------------------------------------------------------------------------------------------------------------------------------------------------------------------------|----------------------|
| <b>INFORMATION SOURCES AND METHODS</b> |    |                                                                                                                                                                                                                                                                    |                      |
| Database name                          | 1  | Name each individual database searched, stating the platform for each.                                                                                                                                                                                             | 2 AND 6              |
| Multi-database searching               | 2  | If databases were searched simultaneously on a single platform, state the name of the platform, listing all of the databases searched.                                                                                                                             | 5                    |
| Study registries                       | 3  | List any study registries searched.                                                                                                                                                                                                                                | N/A                  |
| Online resources and browsing          | 4  | Describe any online or print source purposefully searched or browsed (e.g., tables of contents, print conference proceedings, web sites), and how this was done.                                                                                                   | 6                    |
| Citation searching                     | 5  | Indicate whether cited references or citing references were examined, and describe any methods used for locating cited/citing references (e.g., browsing reference lists, using a citation index, setting up email alerts for references citing included studies). | N/A                  |
| Contacts                               | 6  | Indicate whether additional studies or data were sought by contacting authors, experts, manufacturers, or others.                                                                                                                                                  | N/A                  |
| Other methods                          | 7  | Describe any additional information sources or search methods used.                                                                                                                                                                                                |                      |
| <b>SEARCH STRATEGIES</b>               |    |                                                                                                                                                                                                                                                                    |                      |
| Full search strategies                 | 8  | Include the search strategies for each database and information source, copied and pasted exactly as run.                                                                                                                                                          | 6                    |
| Limits and restrictions                | 9  | Specify that no limits were used, or describe any limits or restrictions applied to a search (e.g., date or time period, language, study design) and provide justification for their use.                                                                          | 6                    |
| Search filters                         | 10 | Indicate whether published search filters were used (as originally designed or modified), and if so, cite the filter(s) used.                                                                                                                                      | 6                    |
| Prior work                             | 11 | Indicate when search strategies from other literature reviews were adapted or reused for a substantive part or all of the search, citing the previous review(s).                                                                                                   | 6                    |

|                         |    |                                                                                                                                    |                |
|-------------------------|----|------------------------------------------------------------------------------------------------------------------------------------|----------------|
| Updates                 | 12 | Report the methods used to update the search(es) (e.g., rerunning searches, email alerts).                                         | 6              |
| Dates of searches       | 13 | For each search strategy, provide the date when the last search occurred.                                                          | 6              |
| <b>PEER REVIEW</b>      |    |                                                                                                                                    |                |
| Peer review             | 14 | Describe any search peer review process.                                                                                           | 6              |
| <b>MANAGING RECORDS</b> |    |                                                                                                                                    |                |
| Total Records           | 15 | Document the total number of records identified from each database and other information sources.                                  | <b>7 and 8</b> |
| Deduplication           | 16 | Describe the processes and any software used to deduplicate records from multiple database searches and other information sources. | 8              |

[32] PRISMA-S: An Extension to the PRISMA Statement for Reporting Literature Searches in Systematic Reviews  
Rethlefsen ML, Kirtley S, Waffenschmidt S, Ayala AP, Moher D, Page MJ, Koffel JB, PRISMA-S Group.  
Last updated February 27, 2020.

## Supplementary File S3

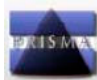

### PRISMA 2020 for Abstracts Checklist

| Section and Topic       | Item # | Checklist item                                                                                                                                                                                                                                                                                        | Reported (Yes/No) |
|-------------------------|--------|-------------------------------------------------------------------------------------------------------------------------------------------------------------------------------------------------------------------------------------------------------------------------------------------------------|-------------------|
| <b>TITLE</b>            |        |                                                                                                                                                                                                                                                                                                       |                   |
| Title                   | 1      | Identify the report as a systematic review.                                                                                                                                                                                                                                                           | Scoping review    |
| <b>BACKGROUND</b>       |        |                                                                                                                                                                                                                                                                                                       |                   |
| Objectives              | 2      | Provide an explicit statement of the main objective(s) or question(s) the review addresses.                                                                                                                                                                                                           | Yes               |
| <b>METHODS</b>          |        |                                                                                                                                                                                                                                                                                                       |                   |
| Eligibility criteria    | 3      | Specify the inclusion and exclusion criteria for the review.                                                                                                                                                                                                                                          | Yes               |
| Information sources     | 4      | Specify the information sources (e.g. databases, registers) used to identify studies and the date when each was last searched.                                                                                                                                                                        | Yes               |
| Risk of bias            | 5      | Specify the methods used to assess risk of bias in the included studies.                                                                                                                                                                                                                              | Yes               |
| Synthesis of results    | 6      | Specify the methods used to present and synthesise results.                                                                                                                                                                                                                                           | Yes               |
| <b>RESULTS</b>          |        |                                                                                                                                                                                                                                                                                                       |                   |
| Included studies        | 7      | Give the total number of included studies and participants and summarise relevant characteristics of studies.                                                                                                                                                                                         | Yes               |
| Synthesis of results    | 8      | Present results for main outcomes, preferably indicating the number of included studies and participants for each. If meta-analysis was done, report the summary estimate and confidence/credible interval. If comparing groups, indicate the direction of the effect (i.e. which group is favoured). | Yes               |
| <b>DISCUSSION</b>       |        |                                                                                                                                                                                                                                                                                                       |                   |
| Limitations of evidence | 9      | Provide a brief summary of the limitations of the evidence included in the review (e.g. study risk of bias, inconsistency and imprecision).                                                                                                                                                           | Yes               |

| Section and Topic | Item # | Checklist item                                                              | Reported (Yes/No) |
|-------------------|--------|-----------------------------------------------------------------------------|-------------------|
| Interpretation    | 10     | Provide a general interpretation of the results and important implications. | Yes               |
| <b>OTHER</b>      |        |                                                                             |                   |
| Funding           | 11     | Specify the primary source of funding for the review.                       | N/A               |
| Registration      | 12     | Provide the register name and registration number.                          | N/A               |

*From:* [31] Page MJ, McKenzie JE, Bossuyt PM, Boutron I, Hoffmann TC, Mulrow CD, et al. The PRISMA 2020 statement: an updated guideline for reporting systematic reviews. BMJ 2021;372:n71. doi: 10.1136/bmj.n71

For more information, visit: <http://www.prisma-statement.org/>
